# Supplementary material for: Mechanistic insights into paracetamol adsorption from water using ZnO nanoparticle-immobilized chitosan-inulin composites: fractal kinetics, statistical physics, thermodynamic analysis, and application to real water samples
Source: Royal Society of Chemistry journal article supplement (doi:10.1039/d5ew00116a), 2025-01-01
Supplement: d5ew00116a1.pdf [file d5ew00116a1.pdf]

## Supplementary Information (SI)

### Mechanistic insights into paracetamol adsorption from water using ZnO nanoparticle-immobilized chitosan-inulin composites: Fractal kinetics, statistical physics, thermodynamic analysis, and application to real water samples

#### Text S1: Experimental apparatus

During the experimental studies, the solution pH was adjusted using a digital pH meter (Cyberscan pH 2100). The PCM concentration in the solution was determined with a UV-Vis spectrophotometer (Shimadzu UV-1800, Japan). Fourier transform infrared (FT-IR) spectra were recorded using a Perkin Elmer Spectrum 2 spectrometer in the range of 4000–400 cm<sup>-1</sup>. Powder X-ray diffraction (XRD) analysis was performed with a Bruker AXS D8 Advance diffractometer (Germany) using Cu K $\alpha$  radiation ( $\lambda = 0.154 \text{ \AA}$ ) to determine the XRD pattern of the material. Surface morphology and elemental composition of the adsorbent were analyzed through scanning electron microscopy (SEM) coupled with energy dispersive X-ray spectroscopy (EDX) (JEOL JSM-6510LV, Japan). Thermogravimetric analysis (TGA) and differential thermal analysis (DTA) were carried out using a Shimadzu DTG-60H thermal analyzer to assess the material's thermal stability and decomposition characteristics. Additionally, the Brunauer–Emmett–Teller (BET) surface area and porosity of the material were measured using a Micromeritics ASAP 2020 surface pore analyzer with nitrogen adsorption/desorption at 77 K.

**Table S1:** Independent variables and their levels used for central composite design.

| Variables    | Unit | Factor | Range and level |        |       |       |            |
|--------------|------|--------|-----------------|--------|-------|-------|------------|
|              |      |        | - $\alpha$      | -1     | 0     | +1    | + $\alpha$ |
| Contact time | (-)  | K      | 12.96           | -30.00 | 55.00 | 80.00 | 97.04      |
| Dosage       | (mg) | L      | 1.59            | 5.00   | 10.00 | 15.00 | 18.41      |

|                              |        |          |      |       |       |        |        |
|------------------------------|--------|----------|------|-------|-------|--------|--------|
| <b>Initial concentration</b> | (mg/L) | <b>M</b> | 6.14 | 30.00 | 65.00 | 100.00 | 123.86 |
|------------------------------|--------|----------|------|-------|-------|--------|--------|

**Table S2:** Mathematical expressions of classical isotherm statistical physics models and its parameters

| Classical isotherm                | Non-linear equation                                                                                                                                                                      | Parameters                      |
|-----------------------------------|------------------------------------------------------------------------------------------------------------------------------------------------------------------------------------------|---------------------------------|
| <b>Langmuir</b>                   | $q_e = \frac{q_m K_L C_e}{1 + K_L C_e}$                                                                                                                                                  | $q_m, K_L$ and $C_e$            |
| <b>Freundlich</b>                 | $q_e = K_F C_e^{1/n}$                                                                                                                                                                    | $K_F$ and $n$                   |
| <b>Statistical physics models</b> |                                                                                                                                                                                          |                                 |
| <b>Model 1 (M<sub>1</sub>)</b>    | $q_e = n N_o \frac{n_1 N_m}{1 + \left(\frac{C_{1/2}}{C_e}\right)^n} = \frac{Q_{sat}}{1 + \left(\frac{C_{1/2}}{C_e}\right)^n}$                                                            | $n, N_o$ and $N_m$              |
| <b>Model 2 (M<sub>2</sub>)</b>    | $q_e = \frac{n_1 N_{m1}}{1 + \left(\frac{C_1}{C}\right)^{n_1}} + \frac{n_2 N_{m2}}{1 + \left(\frac{C_2}{C}\right)^{n_2}}$                                                                | $n_1, n_2, N_{m1}$ and $N_{m2}$ |
| <b>Model 3 (M<sub>3</sub>)</b>    | $q_e = n N_m \left( \frac{\left(\frac{C}{C_{1/2}}\right)^n + 2 \left(\frac{C}{C_{1/2}}\right)^{2n}}{1 + \left(\frac{C}{C_{1/2}}\right)^n + \left(\frac{C}{C_{1/2}}\right)^{2n}} \right)$ | $n$ and $N_m$                   |
| <b>Model 4 (M<sub>4</sub>)</b>    | $q_e = n N_m \left( \frac{\left(\frac{C}{C_1}\right)^n + 2 \left(\frac{C}{C_1}\right)^{2n}}{1 + \left(\frac{C}{C_1}\right)^n + \left(\frac{C}{C_2}\right)^{2n}} \right)$                 | $n$ and $N_m$                   |

where  $q_e$ : experimental adsorption capacity(mg/g),  $q_m$  : calculated adsorption capacity (mg/g),  $C_e$ : concentration of cloxacillin in the solution phase at equilibrium(mg/L),  $K_L$ : Langmuir isotherm constant (L/mg),  $K_F$  and  $\frac{1}{n}$  are Freundlich isotherm constants.  $N_m$  and  $n$  are the density of adsorption sites, occupied by adsorbate (mg/g) and number species which are adsorbed, respectively.  $C_{1/2}$  and  $C$  are the concentration of acetaminophen (mg/L) at half saturation and

equilibrium concentration (mg/L), respectively.  $C_1$  and  $C_2$  suggested the concentration (mg/L) at half saturation of first and second adsorption sites, respectively.  $N_{m1}$  and  $N_{m2}$  are the density of first and second adsorption sites, respectively.  $n_1$  and  $n_2$  indicate the number of adsorbed species at first and second adsorption sites, respectively.

**Table S3**

| Surface based kinetic studies (fractal-like kinetic models) | Mathematical expression                                           |
|-------------------------------------------------------------|-------------------------------------------------------------------|
| F-L PFO                                                     | $q_t = q_e [1 - \exp(-k'_{1,0} t^\alpha)]$                        |
| F-LPSO                                                      | $q_t = \frac{k'_{2,0} q_e^2 t^\alpha}{1 + k'_{2,0} q_e t^\alpha}$ |
| <b>Diffusion based kinetic model</b>                        |                                                                   |
| Intraparticle diffusion model                               | $q_t = k_{id} t^{1/2} + C_{id}$                                   |

In these equations  $k'_{1,0}$  ( $1/\text{min}^\alpha$ ) and  $k'_{2,0}$  ( $\text{mg/g}/\text{min}^\alpha$ ) express the rate coefficients of Fractal-like-PFO, Fractal-like-PSO, respectively.  $\alpha$  denotes fractional time index which is defined as  $\alpha = (1 - h)$ .  $k_{id}$  ( $\text{mg/g min}^{-0.5}$ ) and  $C_{id}$  ( $\text{mg/g}$ ) denotes the intraparticle diffusion rate constant and the boundary layer effect, respectively.

**Table S4:** Nonlinear Langmuir and Freundlich isotherm parameters and error values

| Isotherm   | Temp.<br>(K) | Parameters (Linear) |                 |        |        |          |
|------------|--------------|---------------------|-----------------|--------|--------|----------|
|            |              | $q_m^*$<br>(mg /g)  | $K_L$<br>(L/mg) | $R^2$  | RMSD   | $\chi^2$ |
| Langmuir   | 298          | 287.538             | 1.627           | 0.9996 | 6.149  | 0.004    |
|            | 308          | 282.189             | 2.248           | 0.9997 | 6.147  | 0.003    |
|            | 318          | 279.171             | 3.753           | 0.9996 | 6.083  | 0.002    |
| Freundlich | Temp.<br>(K) | $q_m^*$<br>(mg /g)  | n               | $K_F$  |        |          |
|            |              |                     |                 |        | $R^2$  | RMSD     |
|            |              |                     |                 |        |        | $\chi^2$ |
|            |              |                     |                 |        |        |          |
| Freundlich | 298          | 269.54              | 2.525           | 53.92  | 0.9268 | 16.425   |
|            | 308          | 265.48              | 2.023           | 49.59  | 0.9528 | 13.293   |
|            | 318          | 262.89              | 1.955           | 46.28  | 0.9922 | 9.399    |

\* The experimental values of adsorption capacity ( $q_e$ ) for acetaminophen are 287.15 mg/g, 281.98 and 280.078 mg/g at 298, 308 and 318 K, respectively.

**Table S5:** Mathematical expressions of statistical physics models with  $R^2$  and SSE for fitting of experimental data for the adsorption of acetaminophen onto

| Models            | Temp (K) | Parameters |          |        |
|-------------------|----------|------------|----------|--------|
|                   |          | $R^2$      | $\chi^2$ | RMSD   |
| Model 1 ( $M_1$ ) | 298      | 0.9897     | 2.197    | 14.132 |
|                   | 308      | 0.9908     | 1.7635   | 16.332 |
|                   | 318      | 0.9946     | 1.141    | 13.328 |
| Model 2 ( $M_2$ ) | 298      | 0.9998     | 0.066    | 1.905  |
|                   | 308      | 0.9997     | 0.037    | 1.587  |
|                   | 318      | 0.9999     | 0.031    | 1.721  |
| Model 3 ( $M_3$ ) | 298      | 0.9925     | 6.764    | 26.656 |
|                   | 308      | 0.9698     | 5.675    | 26.282 |
|                   | 318      | 0.9809     | 3.371    | 21.436 |
| Model 4 ( $M_4$ ) | 298      | 0.9895     | 18.635   | 38.783 |
|                   | 308      | 0.9498     | 12.966   | 33.335 |
|                   | 318      | 0.9299     | 7.2337   | 9.399  |

**Table S6.** Diffusion based kinetic parameters and regression coefficients obtained by linear regression analysis for the adsorption of PCM onto ZnO/Cs-In.

| Kinetic model                  | Parameters                             | Concentration (mg/L) |         |         |
|--------------------------------|----------------------------------------|----------------------|---------|---------|
|                                |                                        | 95                   | 115     | 195     |
| Intra-particle diffusion model | $C_{id}$                               | -167.47              | -199.21 | -202.73 |
|                                | I $K_{id}$ (mg/g.min <sup>1/2</sup> )  | 57.813               | 71.119  | 74.703  |
|                                | $R^2$                                  | 0.9992               | 0.9995  | 0.9999  |
|                                | $C_{id}$                               | 94.546               | 150.39  | 170.54  |
|                                | II $K_{id}$ (mg/g.min <sup>1/2</sup> ) | 16.729               | 15.659  | 15.603  |
|                                | $R^2$                                  | 0.9998               | 0.9996  | 0.9994  |

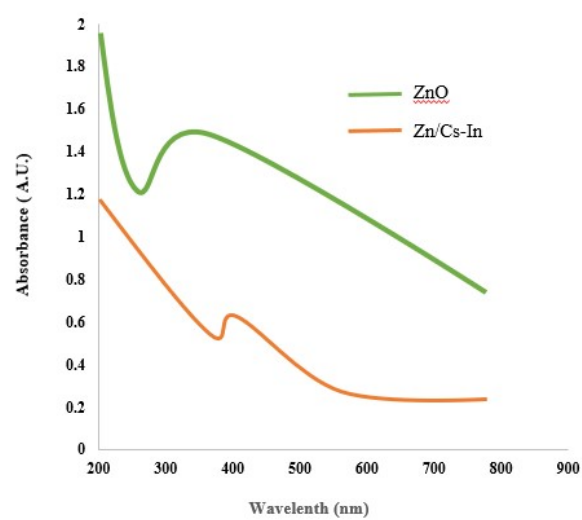

**Fig. S1:** Uv-visible absorption spectra of ZnO nanoparticles and the ZnO/CS-In nanocomposite

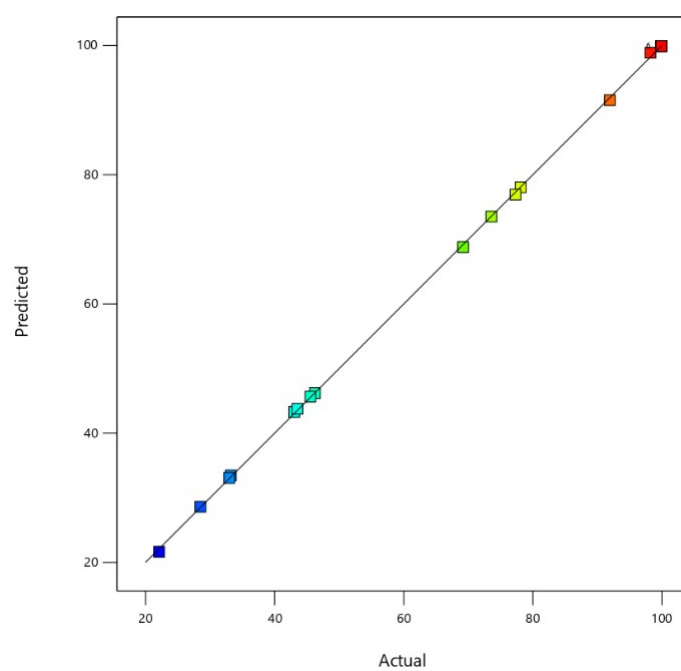

**Fig S2:** Predicted versus actual plot.

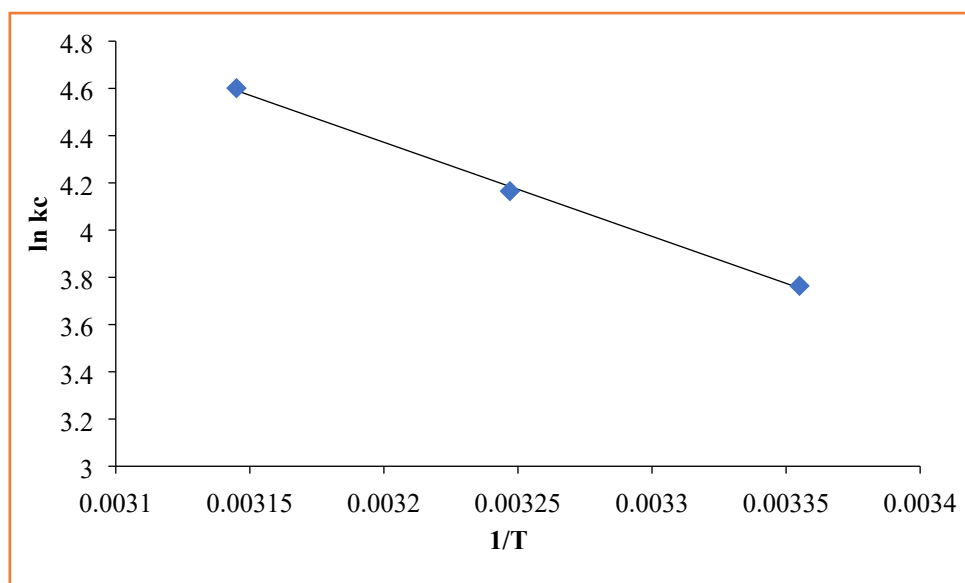

**Fig. S3:** Van't Hoff plot for determining thermodynamic parameters of PCM adsorption onto ZnO/Cs-In

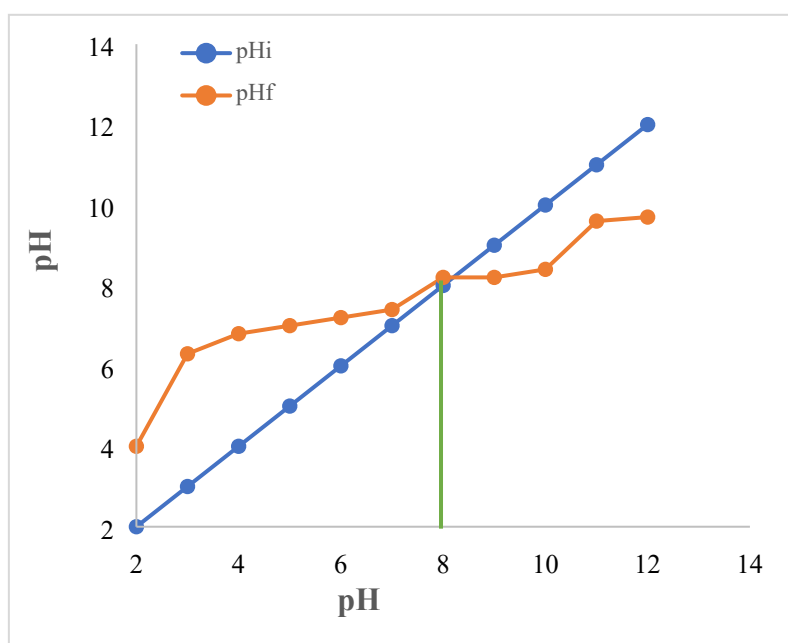

**Fig. S4:** Point of zero charge  $pH_{pzc}$  of the ZnO/Cs-In, determined by the pH drift method
